# Supplementary material for: High prevalence of small intestine bacteria overgrowth and asymptomatic carriage of enteric pathogens in stunted children in Antananarivo, Madagascar
Source: PLoS Negl Trop Dis. 2022 May 9;16(5):e0009849. doi: 10.1371/journal.pntd.0009849 (PMC9119516; doi:10.1371/journal.pntd.0009849)
Supplement: S3 Table — (PDF) [file pntd.0009849.s006.pdf]

**S3 Table. Bivariate analysis for stomach pH and SIBO.**

ttest ph\_estomac, by(SIBO)

Two-sample t test with equal variances

| Group                       | Obs | Mean                    | Std. Err. | Std. Dev.          | [95% Conf. Interval] |          |
|-----------------------------|-----|-------------------------|-----------|--------------------|----------------------|----------|
| No                          | 21  | 2.142857                | .3604608  | 1.651839           | 1.390949             | 2.894765 |
| Yes                         | 79  | 2.646835                | .2462167  | 2.188421           | 2.156656             | 3.137015 |
| combined                    | 100 | 2.541                   | .2089758  | 2.089758           | 2.126347             | 2.955653 |
| diff                        |     | -.5039783               | .5131575  |                    | -1.522323            | .514366  |
| diff = mean(No) - mean(Yes) |     |                         |           | t = -0.9821        |                      |          |
| Ho: diff = 0                |     | degrees of freedom = 98 |           |                    |                      |          |
| Ha: diff < 0                |     | Ha: diff != 0           |           | Ha: diff > 0       |                      |          |
| Pr(T < t) = 0.1642          |     | Pr( T  >  t ) = 0.3285  |           | Pr(T > t) = 0.8358 |                      |          |
